# Supplementary material for: The Inclusion of Green Light in a Red and Blue Light Background Impact the Growth and Functional Quality of Vegetable and Flower Microgreen Species
Source: MDPI journal article supplement (doi:10.3390/horticulturae8030217), 2022-03-01

Figure S1. Relative spectral distributions of RB (A) and RGB (B) LED lighting treatments used in a closed-type microgreen production system

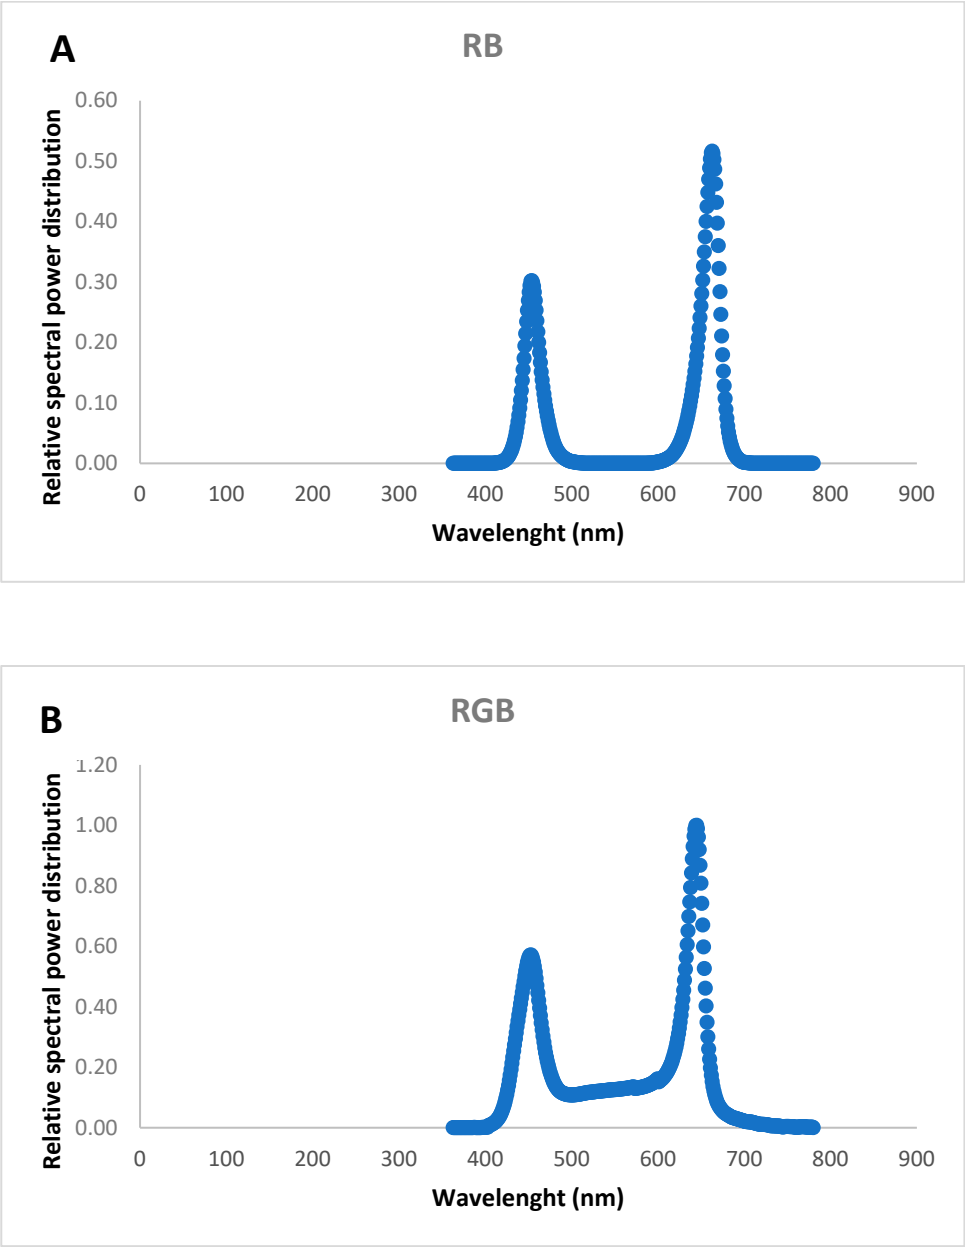

Supplement: s1 [file s1]
