# Supplementary material for: The Inclusion of Green Light in a Red and Blue Light Background Impact the Growth and Functional Quality of Vegetable and Flower Microgreen Species
Source: MDPI journal article supplement (doi:10.3390/horticulturae8030217), 2022-03-01
Supplement: s1 [file s1]

**Table S1.** Growth traits and phytochemical contents parameters, in which the interaction (AxB) between the two factors, irradiance levels (110, 220, 340  $\mu\text{mol m}^{-2} \text{s}^{-1}$ ) and spectral combinations (RB and RGB) (AxB) was not significant. When there was not significant AxB interaction, the effect of light intensity (A) and light spectra (B) was evaluated separately using one-way ANOVA and t-test, respectively. Different letters on the rows within each light spectrum (RB and RGB) indicate significant differences among light intensity (Tukey's test,  $p < 0.05$ ). Pairwise comparisons between light spectra (RB and RGB) among different light intensity were performed using a two-tailed unpaired Student's t tests, assuming equal variances (\* $p < 0.05$ ; \*\* $p < 0.01$ )

| Statistical analysis |                 |               |     |     |     |     |     |            |            |            |
|----------------------|-----------------|---------------|-----|-----|-----|-----|-----|------------|------------|------------|
| Parameter            | Species         | One'way ANOVA |     |     |     |     |     | t-test     |            |            |
|                      |                 | RB            |     |     | RGB |     |     | 110        | 220        | 340        |
|                      |                 | 110           | 220 | 340 | 110 | 220 | 340 | RB vs. RGB | RB vs. RGB | RB vs. RGB |
| FW                   | Green Mizuna    | ns            | ns  | ns  | ns  | ns  | ns  | ns         | ns         | ns         |
|                      | Chicory         | a             | b   | a   | b   | b   | a   | ns         | *          | ns         |
|                      | French Marigold | ns            | ns  | ns  | b   | ab  | a   | ns         | ns         | ns         |
|                      | Celosia         | ns            | ns  | ns  | ns  | ns  | ns  | ns         | ns         | ns         |
| DW                   | China rose      | c             | b   | a   | c   | b   | a   | **         | ns         | ns         |
|                      | Green Mizuna    | b             | a   | a   | b   | ab  | a   | ns         | ns         | ns         |
|                      | Chicory         | c             | b   | a   | c   | b   | a   | ns         | *          | ns         |
|                      | French Marigold | b             | a   | a   | c   | b   | a   | *          | *          | ns         |
|                      | Celosia         | ns            | ns  | ns  | b   | b   | a   | ns         | ns         | *          |
| Phenols              | China rose      | ns            | ns  | ns  | ns  | ns  | ns  | ns         | ns         | ns         |
|                      | Green Mizuna    | b             | a   | ab  | b   | b   | a   | ns         | ns         | ns         |
| FRAP                 | China rose      | ns            | ns  | ns  | a   | b   | b   | ns         | *          | ns         |
|                      | Green Mizuna    | ns            | ns  | ns  | a   | b   | ab  | ns         | **         | *          |
| Chlorophyll          | China rose      | ns            | ns  | ns  | ns  | ns  | ns  | *          | ns         | ns         |
|                      | Green Mizuna    | ns            | ns  | ns  | ns  | ns  | ns  | ns         | ns         | ns         |
|                      | Chicory         | ns            | ns  | ns  | ns  | ns  | ns  | ns         | ns         | ns         |
|                      | Alfalfa         | b             | a   | ab  | ns  | ns  | ns  | ns         | ns         | ns         |
|                      | French Marigold | ns            | ns  | ns  | b   | b   | a   | ns         | ns         | ns         |
|                      | Celosia         | ns            | ns  | ns  | ns  | ns  | ns  | ns         | ns         | ns         |
| Carotenoids          | Green Mizuna    | ns            | ns  | ns  | ns  | ns  | ns  | ns         | ns         | ns         |
|                      | Chicory         | b             | a   | ab  | ns  | ns  | ns  | ns         | ns         | ns         |
|                      | French Marigold | a             | a   | b   | ab  | a   | b   | ns         | ns         | *          |
|                      | Celosia         | b             | a   | c   | a   | a   | b   | *          | **         | ns         |

|               |                 |    |    |    |    |    |    |    |    |    |
|---------------|-----------------|----|----|----|----|----|----|----|----|----|
| <b>Chroma</b> | China rose      | b  | ab | a  | ns | ns | ns | ns | ns | *  |
|               | Chicory         | ns |
|               | Alfalfa         | b  | a  | a  | b  | a  | b  | ns | ** | ns |
|               | French Marigold | ns | ns | ns | b  | a  | ab | ns | ** | ns |
|               | Celosia         | b  | a  | a  | b  | a  | a  | ns | ** | ns |
